# Supplementary material
Source: Research Square preprint supplement (doi:10.21203/rs.3.rs-9775299/v1)
Supplement: Supplementary file 1 [file 77b58feab612a4fdc9c73613.xlsx]

## Sheet: Sheet1
Table A.1 Correlation between the scores of NMDS axis 1 and the values of soil chemical properties
	Plant community in the above ground vegetation					AMF community in the soil
	NMDS axis 1					NMDS axis1
	Estimate	Std. Error	t value	P		Estimate	Std. Error	t value	P
Soil pH	-0.4849	0.1666	-2.911	0.00685		0.37827	0.08939	4.231	0.000213
P2O5	-0.038567	0.006679	-5.775	2.96e-06		0.02792	0.002773	10.07	5.66e-11
CEC	0.03198	0.0121	2.644	0.0131		-0.02309	0.006861	-3.366	0.00217
MgO	0.004566	0.004094	1.115	0.274		-0.005193	0.002318	-2.241	0.0329
K2O	-0.003518	0.003115	-1.13	0.268		0.002975	0.001829	1.626	0.115
CaO	-0.0011048	0.0005229	-2.113	0.0434		0.0009597	0.0002864	3.352	0.00225
BaseSatu	0.012295	0.002641	-4.655	6.62e-05		0.009257	0.0012	7.715	1.65e-08
PacidAC	0.0005752	0.0001436	4.007	0.000393		-0.0004111	7.559e-05	-5.439	7.49e-06
* Both compositions of AMF and vegetation were summarized by NMDS analyses. The linear mixed models were performed by setting scores of NMDS as response variables and values of each soil properties (i.e., soil pH, bio-available soil P, MgO, K2O, CaO, CEC, base saturation and Phosphate absorption coefficient) as explanatory variables with 31 sites as random effect. The eight explanatory variables …
